# Supplementary material for: Longitudinal Changes in Emergency Medical Services Advanced Airway Management
Source: PubMed Central journal article supplement (PMC11342135; doi:10.1001/jamanetworkopen.2024.27763), 2024-08-22

## Supplemental Online Content

Wang HE, Yu MI, Crowe RP, et al. Longitudinal changes in emergency medical services advanced airway management. *JAMA Netw Open*. 2024;7(8):e2427763. doi:10.1001/jamanetworkopen.2024.27763

**eTable 1.** Longitudinal Characteristics of EMS Events in the ESO Data Collaborative, 2011-2022

**eTable 2.** Longitudinal Characteristics of EMS Events With Advanced Airway Management Attempts, ESO Data Collaborative, 2011-2022

**eFigure 1.** Longitudinal Trends in the Incidence of EMS Events With Advanced Airway Management Efforts

**eFigure 2.** Longitudinal Trends in Annual Advanced Airway Management Cases, Stratified by Subgroups

**eFigure 3.** Sensitivity Analysis of Longitudinal Trends in the Annual Percentage of Cardiac Arrests Undergoing Endotracheal Intubation or Supraglottic Airway Insertion Attempts, Stratified by Key Population Subsets

**eFigure 4.** Sensitivity Analysis of Longitudinal Trends in the Annual Percentage of Pediatric Patients Undergoing Endotracheal Intubation or Supraglottic Airway Insertion Attempts, Stratified by Key Population Subsets

This supplemental material has been provided by the authors to give readers additional information about their work.

**eTABLE 1**

Longitudinal characteristics of EMS events in the ESO Data Collaborative, 2011-2022.

| Characteristic                                       | YEAR               |                    |                    |                      |                      |                      |                      |                      |                      |                      |                      |                      | Total                 |
|------------------------------------------------------|--------------------|--------------------|--------------------|----------------------|----------------------|----------------------|----------------------|----------------------|----------------------|----------------------|----------------------|----------------------|-----------------------|
|                                                      | 2011               | 2012               | 2013               | 2014                 | 2015                 | 2016                 | 2017                 | 2018                 | 2019                 | 2020                 | 2021                 | 2022                 |                       |
| <b>EMS Agencies contributing to the data set - n</b> | 192                | 268                | 376                | 500                  | 641                  | 784                  | 1,135                | 1,1230               | 1,265                | 1,975                | 1,934                | 2,670                | N/A                   |
| <b>EMS events – n</b>                                | 547,627            | 850,889            | 1,220,935          | 1,608,091            | 2,045,966            | 2,420,342            | 3,510,724            | 4,539,266            | 5,648,080            | 7,242,258            | 8,206,021            | 9,695,552            | 47,535,751            |
| <b>Age – Mean (SD)</b>                               | 51.9<br>(24.7)     | 52.4<br>(24.5)     | 53.5<br>(24.4)     | 54.1<br>(24.3)       | 54.5<br>(24.2)       | 54.5<br>(24.1)       | 54.3<br>(24.0)       | 54.1<br>(23.8)       | 55.1<br>(23.8)       | 55.5<br>(23.3)       | 55.4<br>(23.4)       | 56.0<br>(23.7)       | 55.0<br>(23.8)        |
| Missing                                              | 9,557              | 24,646             | 41,524             | 52,368               | 65,335               | 81,918               | 119,919              | 104,156              | 189,667              | 202,362              | 234,175              | 297,332              | 1,422,959             |
| <b>Sex</b>                                           |                    |                    |                    |                      |                      |                      |                      |                      |                      |                      |                      |                      |                       |
| Male – n (%)                                         | 246,841<br>(45.1%) | 376,616<br>(44.3%) | 538,677<br>(44.1%) | 711,253<br>(44.2%)   | 910,620<br>(44.5%)   | 1,079,999<br>(44.6%) | 1,575,751<br>(44.9%) | 2,067,112<br>(45.5%) | 2,593,575<br>(45.9%) | 3,422,387<br>(47.3%) | 3,846,646<br>(46.9%) | 4,501,619<br>(46.4%) | 21,871,096<br>(46.0%) |
| Female – n (%)                                       | 288,670<br>(52.7%) | 446,545<br>(52.5%) | 637,440<br>(52.2%) | 839,092<br>(52.2%)   | 1,064,195<br>(52.0%) | 1,247,699<br>(51.5%) | 1,792,530<br>(51.1%) | 2,299,314<br>(50.6%) | 2,850,587<br>(50.5%) | 3,558,756<br>(49.1%) | 4,079,514<br>(49.7%) | 4,872,293<br>(50.2%) | 23,976,635<br>(50.4%) |
| Unknown – n (%)                                      | 0<br>(0.0%)        | 0<br>(0.0%)        | 0<br>(0.0%)        | 0<br>(0.0%)          | 0<br>(0.0%)          | 4<br>(<0.1%)         | 79<br>(<0.1%)        | 89<br>(<0.1%)        | 1,717<br>(<0.1%)     | 2,238<br>(<0.1%)     | 2,658<br>(<0.1%)     | 3,388<br>(<0.1%)     | 10,173<br>(<0.1%)     |
| Not reported (missing) – n (%)                       | 12,116<br>(2.2%)   | 27,728<br>(3.3%)   | 44,818<br>(3.7%)   | 57,746<br>(3.6%)     | 71,151<br>(3.5%)     | 92,640<br>(3.8%)     | 142,364<br>(4.1%)    | 172,751<br>(3.8%)    | 202,201<br>(3.6%)    | 258,877<br>(3.6%)    | 277,203<br>(3.4%)    | 318,252<br>(3.3%)    | 1,677,847<br>(3.5%)   |
| <b>Urbanicity</b>                                    |                    |                    |                    |                      |                      |                      |                      |                      |                      |                      |                      |                      |                       |
| Rural – n (%)                                        | 105,420<br>(19.2%) | 163,053<br>(19.2%) | 218,874<br>(17.9%) | 297,983<br>(18.5%)   | 396,235<br>(19.4%)   | 467,304<br>(19.3%)   | 614,075<br>(17.5%)   | 715,545<br>(15.8%)   | 875,024<br>(15.5%)   | 1,095,286<br>(15.1%) | 1,200,820<br>(14.6%) | 1,439,059<br>(14.8%) | 7,588,678<br>(16.0%)  |
| Urban – n (%)                                        | 435,730<br>(79.6%) | 677,402<br>(79.6%) | 984,703<br>(80.7%) | 1,277,536<br>(79.4%) | 1,609,470<br>(78.7%) | 1,921,980<br>(79.4%) | 2,868,159<br>(81.7%) | 3,786,955<br>(83.4%) | 4,731,922<br>(83.8%) | 6,088,066<br>(84.1%) | 6,957,755<br>(84.8%) | 8,193,850<br>(84.5%) | 39,533,528<br>(83.0%) |
| Missing – n (%)                                      | 6,477<br>(1.2%)    | 10,434<br>(1.2%)   | 17,358<br>(1.4%)   | 32,572<br>(2.0%)     | 40,261<br>(2.0%)     | 31,058<br>(1.3%)     | 28,490<br>(0.8%)     | 36,766<br>(0.8%)     | 41,134<br>(0.7%)     | 58,906<br>(0.8%)     | 47,446<br>(0.6%)     | 62,643<br>(0.7%)     | 413,545<br>(1.0%)     |
| <b>Medical vs. Trauma</b>                            |                    |                    |                    |                      |                      |                      |                      |                      |                      |                      |                      |                      |                       |
| Medical – n (%)                                      | 265,389<br>(48.5%) | 442,005<br>(52.0%) | 653,877<br>(53.6%) | 878,707<br>(54.6%)   | 1,148,695<br>(56.1%) | 1,558,218<br>(64.4%) | 2,478,773<br>(70.6%) | 3,337,313<br>(73.5%) | 4,160,406<br>(73.7%) | 5,425,487<br>(74.9%) | 6,164,291<br>(75.1%) | 7,517,412<br>(77.5%) | 34,030,573<br>(71.6%) |
| Trauma – n (%)                                       | 14,384<br>(2.6%)   | 21,999<br>(2.6%)   | 33,244<br>(2.7%)   | 44,506<br>(2.8%)     | 57,973<br>(2.8%)     | 66,305<br>(2.7%)     | 84,886<br>(2.4%)     | 109,342<br>(2.4%)    | 139,061<br>(2.5%)    | 182,327<br>(2.5%)    | 212,897<br>(2.6%)    | 260,410<br>(2.7%)    | 966,924<br>(2.0%)     |

| Characteristic        | YEAR               |                    |                      |                      |                      |                      |                      |                      |                      |                      |                      |                      | Total                 |
|-----------------------|--------------------|--------------------|----------------------|----------------------|----------------------|----------------------|----------------------|----------------------|----------------------|----------------------|----------------------|----------------------|-----------------------|
|                       | 2011               | 2012               | 2013                 | 2014                 | 2015                 | 2016                 | 2017                 | 2018                 | 2019                 | 2020                 | 2021                 | 2022                 |                       |
| Medical and Trauma    | 96,149             | 144,420            | 201,157              | 261,983              | 339,705              | 434,934              | 657,307              | 867,940              | 1,090,900            | 1,300,303            | 1,443,532            | 1,689,746            | 8,528,076             |
| – n (%)               | (17.6%)            | (17.0%)            | (16.5%)              | (16.3%)              | (16.6%)              | (18.0%)              | (18.7%)              | (19.1%)              | (19.3%)              | (17.9%)              | (17.6%)              | (17.4%)              | (17.9%)               |
| Missing – n (%)       | 171,705<br>(31.4%) | 242,465<br>(28.5%) | 332,657<br>(27.2%)   | 422,895<br>(26.3%)   | 499,593<br>(24.4%)   | 360,885<br>(14.9%)   | 289,758<br>(8.2%)    | 224,671<br>(5.0%)    | 257,713<br>(4.6%)    | 334,141<br>(4.6%)    | 385,301<br>(4.7%)    | 488,394<br>(5.0%)    | 4,010,178<br>(8.4%)   |
| <b>Cardiac Arrest</b> |                    |                    |                      |                      |                      |                      |                      |                      |                      |                      |                      |                      |                       |
| No – n (%)            | 542,863<br>(99.1%) | 843,148<br>(99.1%) | 1,208,883<br>(99.0%) | 1,591,990<br>(99.0%) | 2,026,222<br>(99.0%) | 2,395,810<br>(99.0%) | 3,469,454<br>(98.8%) | 4,486,154<br>(98.8%) | 5,580,052<br>(98.8%) | 7,132,930<br>(98.5%) | 8,091,224<br>(98.6%) | 9,568,459<br>(98.7%) | 46,937,189<br>(98.7%) |
| Yes – n (%)           | 4,764<br>(0.9%)    | 7,741<br>(0.9%)    | 12,052<br>(1.0%)     | 16,101<br>(1.0%)     | 19,744<br>(1.0%)     | 24,532<br>(1.0%)     | 41,270<br>(1.2%)     | 53,112<br>(1.2%)     | 68,028<br>(1.2%)     | 109,328<br>(1.5%)    | 114,797<br>(1.4%)    | 127,093<br>(1.3%)    | 598,562<br>(1.3%)     |
| <b>Census Region</b>  |                    |                    |                      |                      |                      |                      |                      |                      |                      |                      |                      |                      |                       |
| Midwest – n (%)       | 73,088<br>(13.3%)  | 125,993<br>(14.8%) | 165,578<br>(13.6%)   | 294,851<br>(18.3%)   | 420,594<br>(20.6%)   | 511,649<br>(21.1%)   | 796,301<br>(22.7%)   | 1,004,859<br>(22.1%) | 1,276,492<br>(22.6%) | 1,779,476<br>(24.6%) | 2,003,115<br>(24.4%) | 2,336,692<br>(24.1%) | 10,788,688<br>(22.7%) |
| Northeast – n (%)     | 31,301<br>(5.7%)   | 37,938<br>(4.5%)   | 59,945<br>(4.9%)     | 78,674<br>(4.9%)     | 113,900<br>(5.6%)    | 147,500<br>(6.1%)    | 147,466<br>(4.2%)    | 256,861<br>(5.7%)    | 270,721<br>(4.8%)    | 489,891<br>(6.8%)    | 542,795<br>(6.6%)    | 805,612<br>(8.3%)    | 2,982,604<br>(6.3%)   |
| South – n (%)         | 350,095<br>(63.9%) | 549,275<br>(64.5%) | 808,251<br>(66.2%)   | 1,018,918<br>(63.4%) | 1,240,680<br>(60.6%) | 1,432,438<br>(59.2%) | 2,080,570<br>(59.3%) | 2,457,490<br>(54.1%) | 3,129,953<br>(55.4%) | 3,692,176<br>(51.0%) | 4,155,268<br>(50.6%) | 4,565,169<br>(47.1%) | 25,480,283<br>(53.6%) |
| West – n (%)          | 92,950<br>(17.0%)  | 137,113<br>(16.1%) | 185,728<br>(15.2%)   | 214,332<br>(13.3%)   | 268,523<br>(13.1%)   | 320,683<br>(13.2%)   | 476,416<br>(13.6%)   | 808,414<br>(17.8%)   | 933,089<br>(16.5%)   | 1,201,234<br>(16.6%) | 1,409,516<br>(17.2%) | 1,536,391<br>(15.8%) | 7,584,389<br>(16.0%)  |
| Missing – n (%)       | 193<br>(0.0%)      | 570<br>(0.1%)      | 1,433<br>(0.1%)      | 1,316<br>(0.1%)      | 2,269<br>(0.1%)      | 8,072<br>(0.3%)      | 9,971<br>(0.3%)      | 11,642<br>(0.3%)     | 37,825<br>(0.7%)     | 79,481<br>(1.1%)     | 95,327<br>(1.2%)     | 451,688<br>(4.7%)    | 699,787<br>(1.5%)     |

**eTABLE 2**

Longitudinal characteristics of EMS events with advanced airway management attempts, ESO Data Collaborative, 2011-2022.

| Characteristic                                                                | YEAR             |                  |                  |                   |                   |                   |                   |                   |                   |                   |                   |                   | Total              |
|-------------------------------------------------------------------------------|------------------|------------------|------------------|-------------------|-------------------|-------------------|-------------------|-------------------|-------------------|-------------------|-------------------|-------------------|--------------------|
|                                                                               | 2011             | 2012             | 2013             | 2014              | 2015              | 2016              | 2017              | 2018              | 2019              | 2020              | 2021              | 2022              |                    |
| <b>EMS events – n</b>                                                         | 547,627          | 850,889          | 1,220,935        | 1,608,091         | 2,045,966         | 2,420,342         | 3,510,724         | 4,539,266         | 5,648,080         | 7,242,258         | 8,206,021         | 9,695,552         | 47,535,751         |
| <b>Advanced Airway Management Incidence (95% CI) - n per 1,000 EMS Events</b> | 5,153<br>9.4     | 7,790<br>9.2     | 11,513<br>9.4    | 14,736<br>9.2     | 18,404<br>9.0     | 22,504<br>9.3     | 32,449<br>9.2     | 43,586<br>9.6     | 49,589<br>8.8     | 67,710<br>9.3     | 82,098<br>10.0    | 88,509<br>9.1     | 444,041<br>9.3     |
| <b>Age – mean (SD)</b>                                                        | 59.4<br>(20.7)   | 59.6<br>(20.5)   | 60.5<br>(20.2)   | 60.5<br>(20.2)    | 60.5<br>(20.3)    | 60.0<br>(20.1)    | 60.2<br>(20.0)    | 60.8<br>(19.7)    | 61.1<br>(19.5)    | 60.8<br>(19.6)    | 60.6<br>(19.6)    | 60.5<br>(19.9)    | 60.6<br>(19.8)     |
| Missing                                                                       | 158<br>(3.1%)    | 219<br>(2.8%)    | 358<br>(3.1%)    | 388<br>(2.6%)     | 457<br>(2.5%)     | 588<br>(2.6%)     | 1,078<br>(3.3%)   | 1,619<br>(3.7%)   | 1,986<br>(4.0%)   | 2,974<br>(4.4%)   | 3,693<br>(4.5%)   | 122<br>(0.1%)     | 13,640<br>(3.1%)   |
| <b>Sex</b>                                                                    |                  |                  |                  |                   |                   |                   |                   |                   |                   |                   |                   |                   |                    |
| Male – n (%)                                                                  | 3,142<br>(61.0%) | 4,629<br>(59.4%) | 6,888<br>(59.8%) | 8,833<br>(59.9%)  | 11,186<br>(60.8%) | 13,755<br>(61.1%) | 19,756<br>(60.9%) | 26,771<br>(61.4%) | 30,424<br>(61.4%) | 41,946<br>(62.0%) | 50,EMS<br>(62.0%) | 55,055<br>(62.2%) | 273,296<br>(61.5%) |
| Female – n (%)                                                                | 1,977<br>(38.4%) | 3,095<br>(39.7%) | 4,536<br>(39.4%) | 5,804<br>(39.4%)  | 7,121<br>(38.7%)  | 8,607<br>(38.2%)  | 12,451<br>(38.4%) | 16,455<br>(37.8%) | 18,781<br>(37.9%) | 25,381<br>(37.5%) | 30,856<br>(37.6%) | 33,228<br>(37.5%) | 168,292<br>(37.9%) |
| Not reported – n (%)                                                          | 34<br>(0.7%)     | 66<br>(0.8%)     | 89<br>(0.8%)     | 99<br>(0.7%)      | 97<br>(0.5%)      | 142<br>(0.6%)     | 241<br>(0.7%)     | 360<br>(0.8%)     | 377<br>(0.8%)     | 376<br>(0.6%)     | 327<br>(0.4%)     | 211<br>(0.2%)     | 2,419<br>(0.5%)    |
| Unknown – n (%)                                                               | 0<br>(0.0%)      | 0<br>(0.0%)      | 0<br>(0.0%)      | 0<br>(0.0%)       | 0<br>(0.0%)       | 0<br>(0.0%)       | 1<br>(0.0%)       | 0<br>(0.0%)       | 7<br>(0.0%)       | 7<br>(0.0%)       | 4<br>(0.0%)       | 15<br>(0.0%)      | 34<br>(0.0%)       |
| <b>Urbanicity</b>                                                             |                  |                  |                  |                   |                   |                   |                   |                   |                   |                   |                   |                   |                    |
| Rural – n (%)                                                                 | 1,147<br>(22.3%) | 1,704<br>(21.9%) | 2,344<br>(20.4%) | 3,040<br>(20.6%)  | 4,147<br>(22.5%)  | 5,160<br>(22.9%)  | 6,582<br>(20.3%)  | 7,960<br>(18.3%)  | 8,613<br>(17.4%)  | 11,644<br>(17.2%) | 13,796<br>(16.8%) | 14,924<br>(16.9%) | 81,061<br>(18.3%)  |
| Urban – n (%)                                                                 | 3,961<br>(76.9%) | 6,006<br>(77.1%) | 8,983<br>(78.0%) | 11,333<br>(76.9%) | 13,824<br>(75.1%) | 17,037<br>(75.7%) | 25,671<br>(79.1%) | 35,308<br>(81.0%) | 40,668<br>(82.0%) | 55,635<br>(82.2%) | 67,875<br>(82.7%) | 73,096<br>(82.6%) | 359,397<br>(80.9%) |
| Missing – n (%)                                                               | 45<br>(0.9%)     | 80<br>(1.0%)     | 186<br>(1.6%)    | 363<br>(2.5%)     | 433<br>(2.4%)     | 307<br>(1.4%)     | 196<br>(0.6%)     | 318<br>(0.7%)     | 308<br>(0.6%)     | 431<br>(0.6%)     | 427<br>(0.5%)     | 489<br>(0.6%)     | 3,583<br>(0.8%)    |
| <b>Medical vs. Trauma</b>                                                     |                  |                  |                  |                   |                   |                   |                   |                   |                   |                   |                   |                   |                    |
| Medical – n (%)                                                               | 3,403<br>(66.0%) | 5,471<br>(70.2%) | 8,357<br>(72.6%) | 10,811<br>(73.4%) | 13,855<br>(75.3%) | 18,968<br>(84.3%) | 29,282<br>(90.2%) | 39,794<br>(91.3%) | 45,215<br>(91.2%) | 61,861<br>(91.4%) | 75,251<br>(91.7%) | 81,041<br>(91.6%) | 393,309<br>(88.6%) |
| Trauma – n (%)                                                                | 419<br>(8.1%)    | 661<br>(8.5%)    | 864<br>(7.5%)    | 1,087<br>(7.4%)   | 1,466<br>(8.0%)   | 1,959<br>(8.7%)   | 2,893<br>(8.9%)   | 3,635<br>(8.3%)   | 4,245<br>(8.6%)   | 5,687<br>(8.4%)   | 6,651<br>(8.1%)   | 7,248<br>(8.2%)   | 36,815<br>(8.3%)   |
| Missing – n (%)                                                               | 1,331<br>(25.8%) | 1,658<br>(21.3%) | 2,292<br>(19.9%) | 2,838<br>(19.3%)  | 3,083<br>(16.8%)  | 1,577<br>(7.0%)   | 274<br>(0.8%)     | 157<br>(0.4%)     | 129<br>(0.3%)     | 162<br>(0.2%)     | 196<br>(0.2%)     | 220<br>(0.2%)     | 13,917<br>(3.1%)   |

| Characteristic        | YEAR             |                  |                  |                  |                   |                   |                   |                   |                   |                   |                   |                   | Total              |
|-----------------------|------------------|------------------|------------------|------------------|-------------------|-------------------|-------------------|-------------------|-------------------|-------------------|-------------------|-------------------|--------------------|
|                       | 2011             | 2012             | 2013             | 2014             | 2015              | 2016              | 2017              | 2018              | 2019              | 2020              | 2021              | 2022              |                    |
| <b>Cardiac Arrest</b> |                  |                  |                  |                  |                   |                   |                   |                   |                   |                   |                   |                   |                    |
| Yes – n (%)           | 2,831<br>(54.9%) | 4,785<br>(61.4%) | 7,293<br>(63.4%) | 9,510<br>(64.5%) | 11,761<br>(63.9%) | 14,582<br>(64.8%) | 24,408<br>(75.2%) | 34,125<br>(78.3%) | 39,269<br>(79.2%) | 55,131<br>(81.4%) | 66,824<br>(81.4%) | 72,793<br>(82.2%) | 343,312<br>(77.3%) |
| No – n (%)            | 17<br>(0.3%)     | 30<br>(0.4%)     | 63<br>(0.6%)     | 79<br>(0.5%)     | 81<br>(0.4%)      | 84<br>(0.4%)      | 82<br>(0.2%)      | 95<br>(0.2%)      | 108<br>(0.2%)     | 150<br>(0.2%)     | 195<br>(0.2%)     | 214<br>(0.2%)     | 1,198<br>(0.3%)    |
| Missing – n (%)       | 2,305<br>(44.7%) | 2,975<br>(38.2%) | 4,157<br>(36.1%) | 5,147<br>(34.9%) | 6,562<br>(35.7%)  | 7,838<br>(34.8%)  | 7,959<br>(24.5%)  | 9,366<br>(21.5%)  | 10,212<br>(20.6%) | 12,429<br>(18.4%) | 15,079<br>(18.4%) | 15,502<br>(17.5%) | 99,531<br>(22.4%)  |
| <b>Census Region</b>  |                  |                  |                  |                  |                   |                   |                   |                   |                   |                   |                   |                   |                    |
| Midwest – n (%)       | 638<br>(12.4%)   | 1,116<br>(14.3%) | 1,507<br>(13.1%) | 2,734<br>(18.6%) | 3,950<br>(21.5%)  | 5,321<br>(23.6%)  | 7,547<br>(23.3%)  | 8,657<br>(19.9%)  | 11,284<br>(22.8%) | 16,392<br>(24.2%) | 20,422<br>(24.9%) | 22,266<br>(25.2%) | 101,834<br>(22.9%) |
| Northeast – n (%)     | 201<br>(3.9%)    | 218<br>(2.8%)    | 361<br>(3.1%)    | 461<br>(3.1%)    | 640<br>(3.5%)     | 758<br>(3.4%)     | 947<br>(2.9%)     | 1,607<br>(3.7%)   | 1,876<br>(3.8%)   | 2,950<br>(4.4%)   | 3,875<br>(4.7%)   | 4,924<br>(5.6%)   | 18,818<br>(4.2%)   |
| South – n (%)         | 3,326<br>(64.5%) | 5,014<br>(64.4%) | 7,648<br>(66.4%) | 9,438<br>(64.0%) | 11,392<br>(61.9%) | 13,581<br>(60.4%) | 19,653<br>(60.6%) | 21,904<br>(50.2%) | 28,818<br>(58.1%) | 38,394<br>(56.7%) | 45,126<br>(55.0%) | 44,885<br>(50.7%) | 249,179<br>(56.1%) |
| West – n (%)          | 984<br>(19.1%)   | 1,437<br>(18.4%) | 1,981<br>(17.2%) | 2,087<br>(14.2%) | 2,403<br>(13.1%)  | 2,822<br>(12.5%)  | 4,281<br>(13.2%)  | 5,342<br>(12.3%)  | 7,155<br>(14.4%)  | 9,563<br>(14.1%)  | 12,036<br>(14.7%) | 13,005<br>(14.7%) | 63,096<br>(14.2%)  |
| Missing – n (%)       | 4<br>(0.1%)      | 5<br>(0.1%)      | 16<br>(0.1%)     | 16<br>(0.1%)     | 19<br>(0.1%)      | 22<br>(0.1%)      | 21<br>(0.1%)      | 6,076<br>(13.9%)  | 456<br>(0.9%)     | 411<br>(0.6%)     | 639<br>(0.8%)     | 3,429<br>(3.9%)   | 11,114<br>(2.5%)   |

**eFIGURE 1**

Longitudinal trends in the incidence of EMS events with advanced airway management efforts. Bar graph depicts total number of advanced airway cases in the data set. ESO Data Collaborative 2011-2022. Test of trend from unobserved components model:  $p$  for trend=0.62.

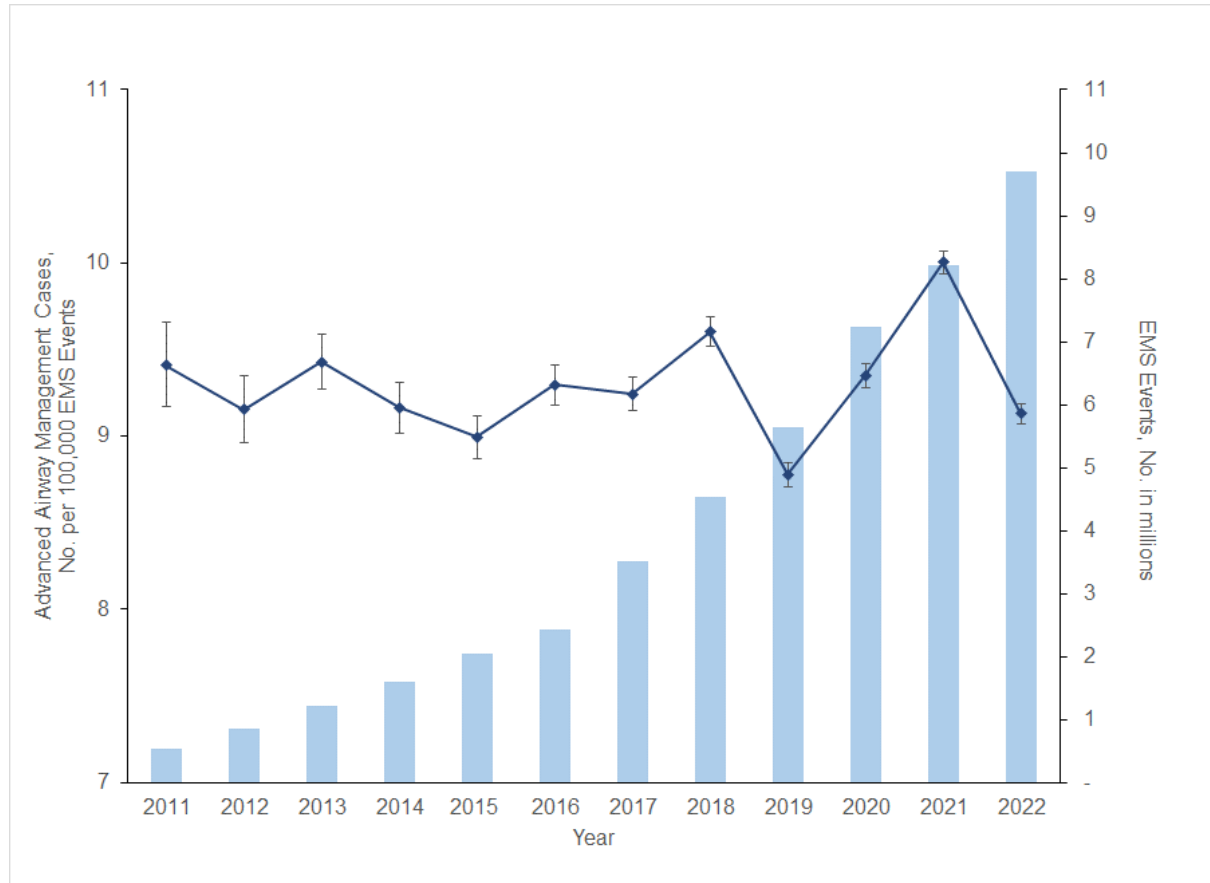

**eFIGURE 2**

Longitudinal trends in annual advanced airway management cases, stratified by subgroups (cardiac arrest, non-arrest medical and non-arrest trauma, and pediatrics). ESO Data Collaborative, 2011-2022. Bar graph depicts total number of advanced airway management cases in the data set. Includes 343,312 cardiac arrest, 79,358 non-arrest medical, and 21,371 non-arrest trauma and 11,204 pediatric advanced airway management cases. Tests of trend from unobserved components models: Cardiac arrest  $p$  for trend=0.002. Non-arrest medical  $p$  for trend<0.001. Non-arrest trauma  $p$  for trend<0.01. Pediatrics  $p$  for trend<0.001.

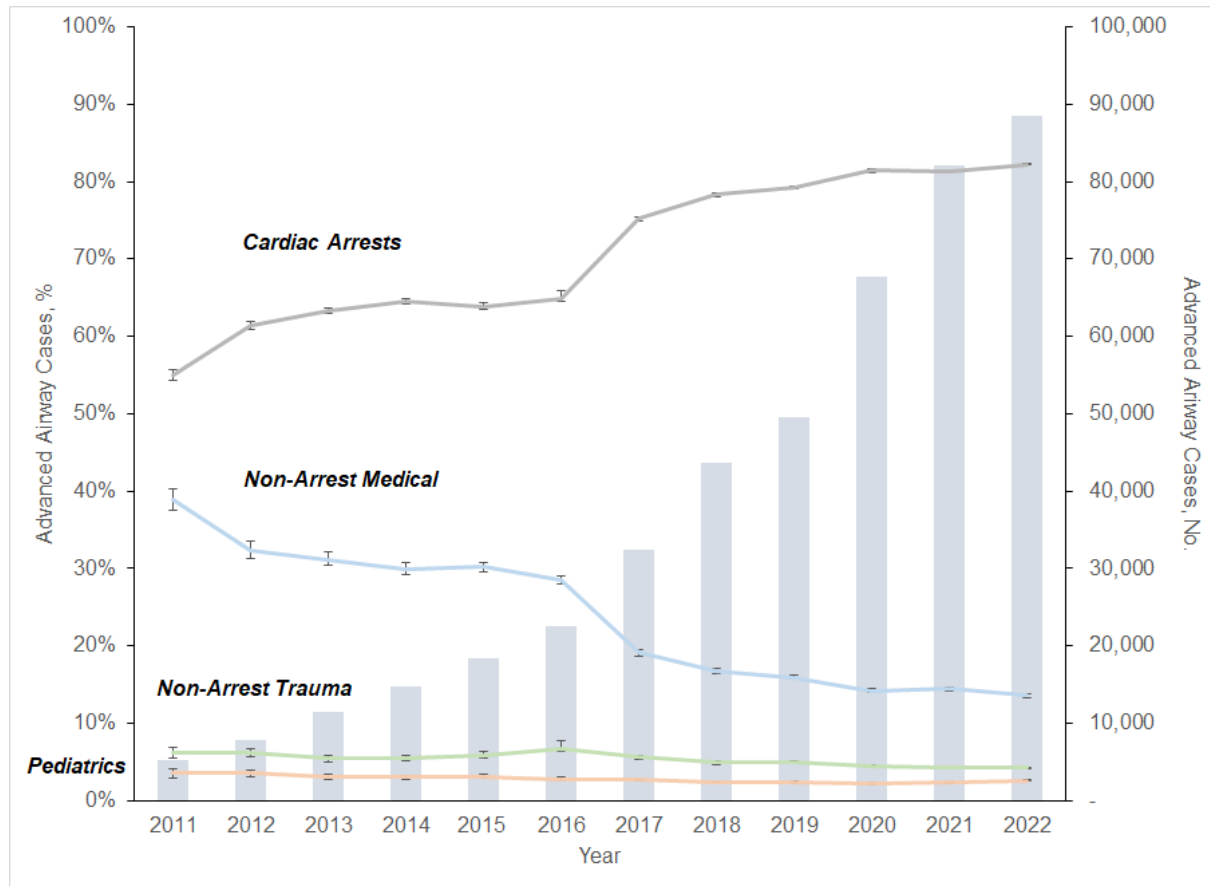

**eFIGURE 3**

Sensitivity analysis. Longitudinal trends in the annual percentage of cardiac arrests undergoing endotracheal intubation (ETI) or supraglottic airway (SGA) insertion attempts, stratified by key population subsets (patient age, sex, population setting, census region). ESO Data Collaborative, 2011-2022. Totals may exceed 100% because an individual patient may have undergone both SGA and ETI attempts.

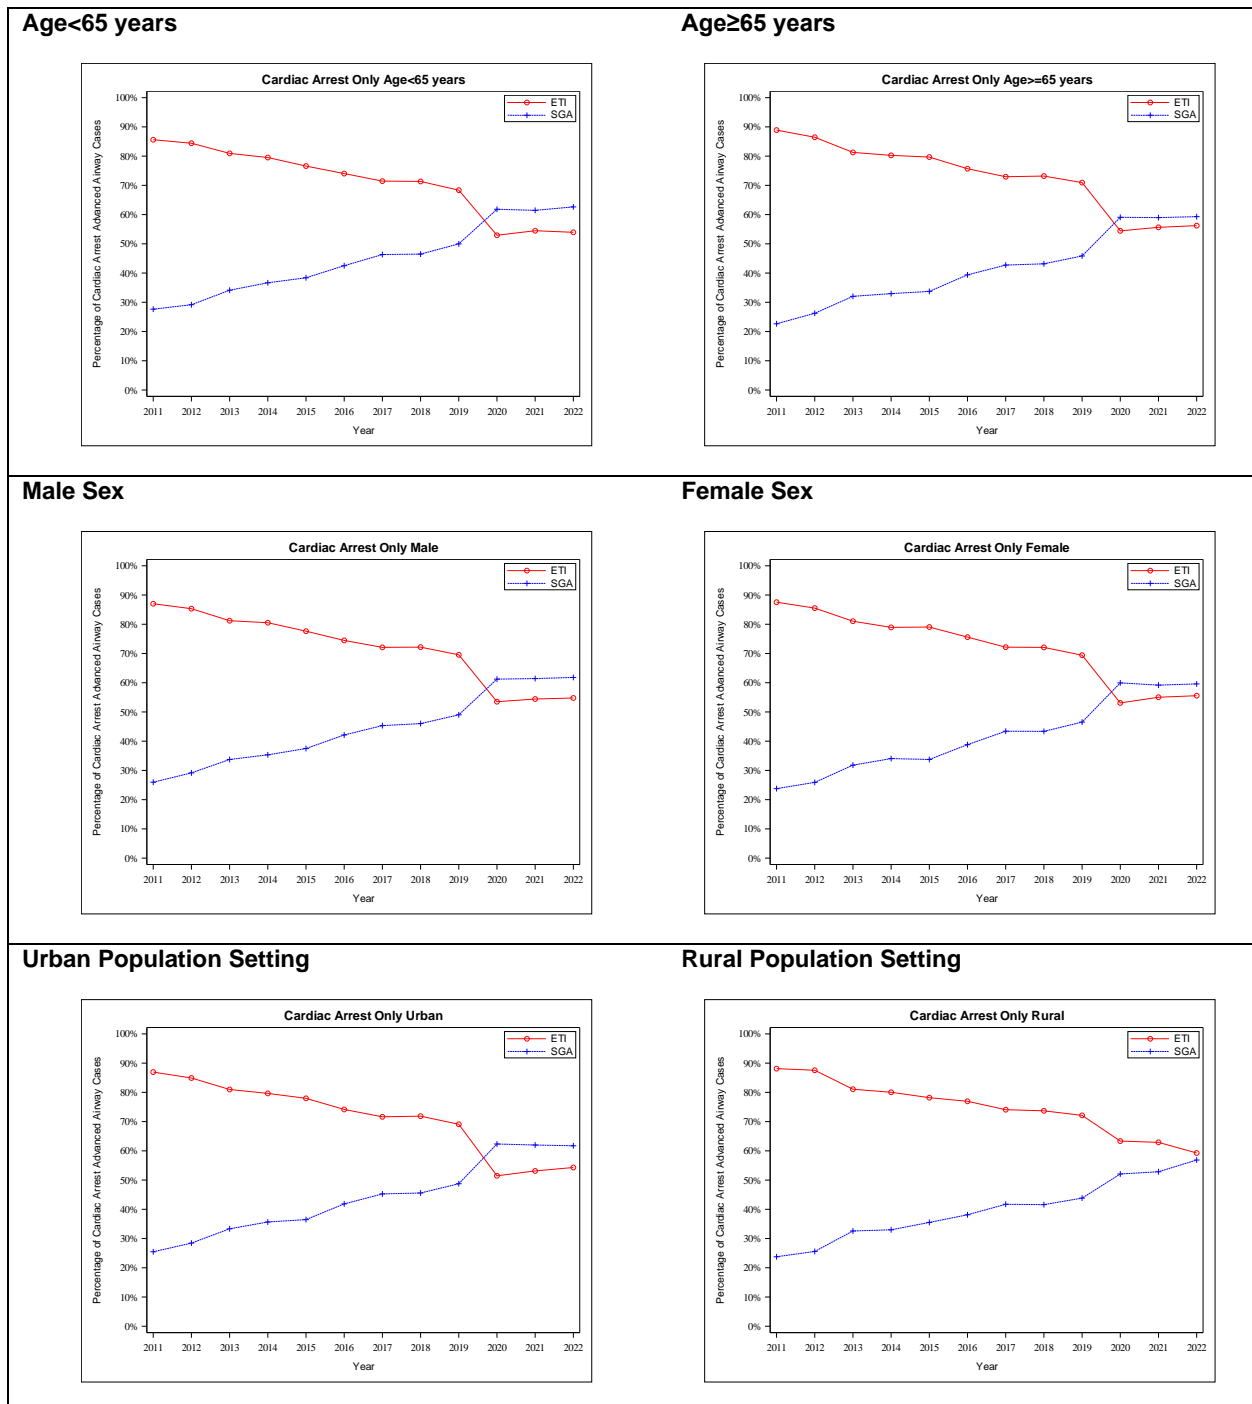



### Northeast Census Region

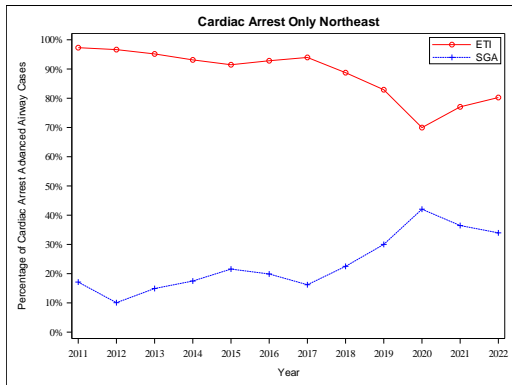

### Midwest Census Region

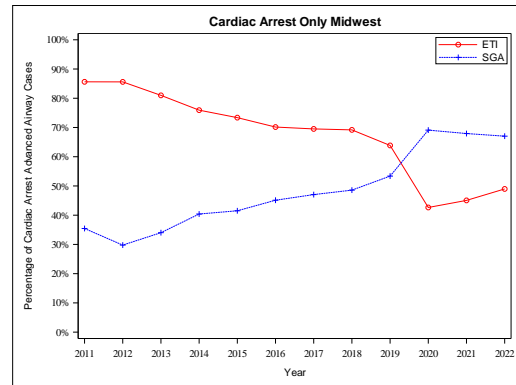

### South Census Region

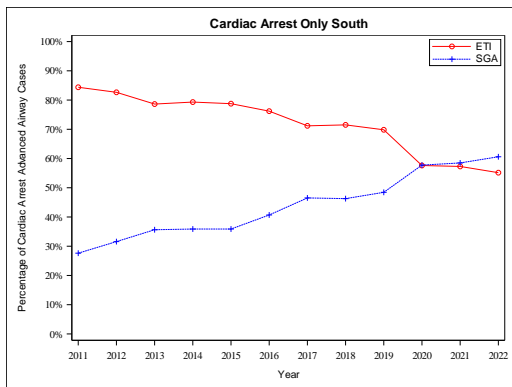

### West Census Region

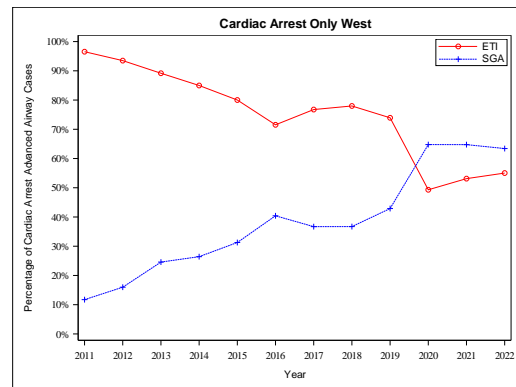

**eFIGURE 4**

Sensitivity analysis. Longitudinal trends in the annual percentage of pediatric patients undergoing endotracheal intubation (ETI) or supraglottic airway (SGA) insertion attempts, stratified by key population subsets (patient sex, population setting, census region). ESO Data Collaborative, 2011-2022. Totals may exceed 100% because an individual patient may have undergone both SGA and ETI attempts.

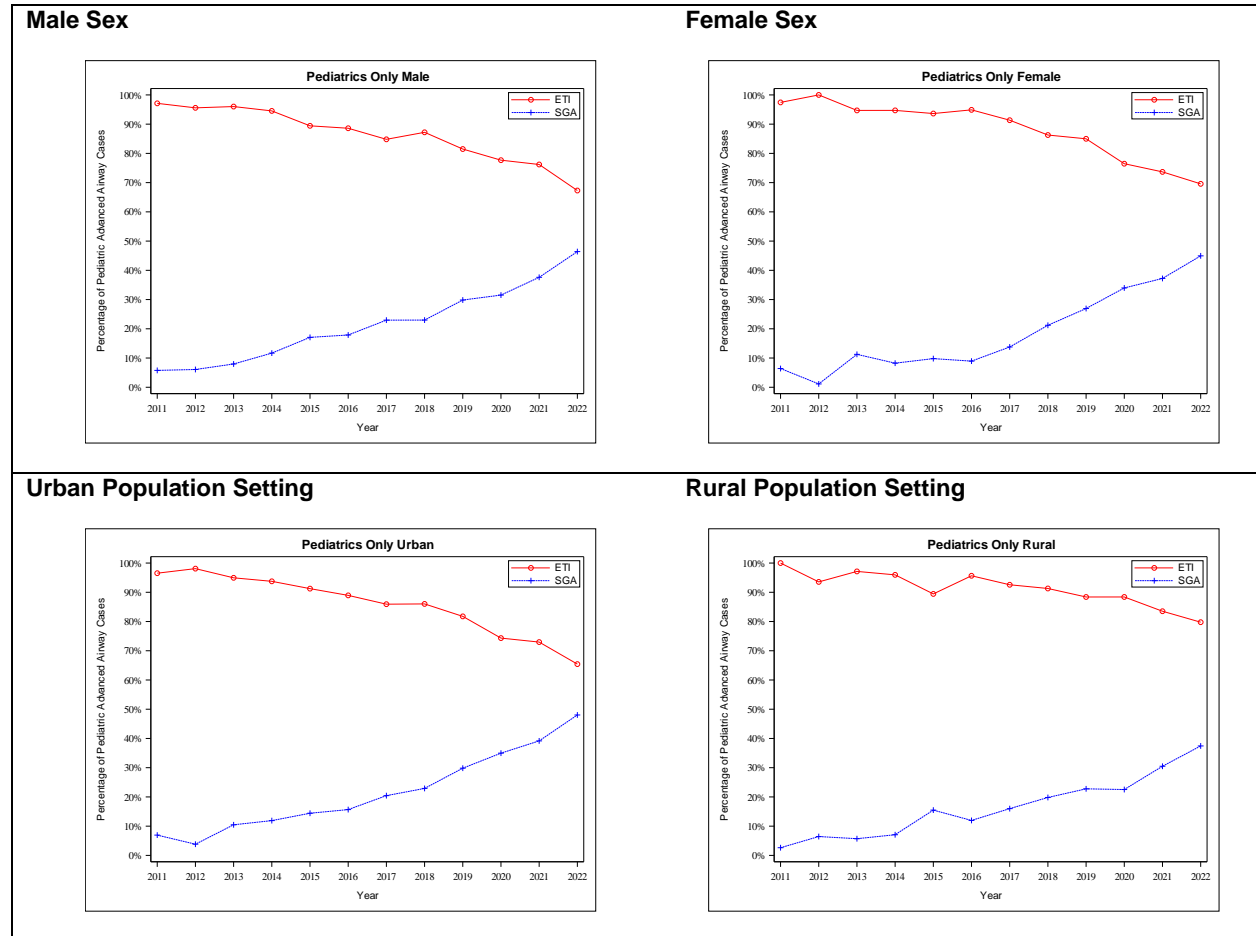

### Northeast Census Region

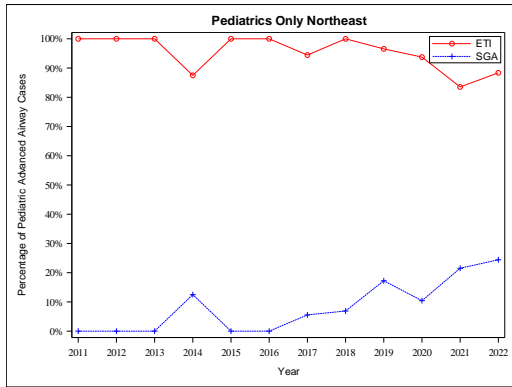

### Midwest Census Region

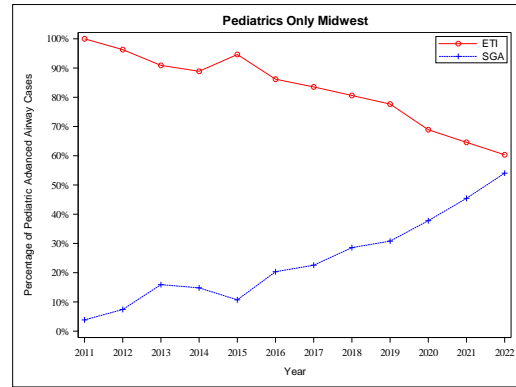

### South Census Region

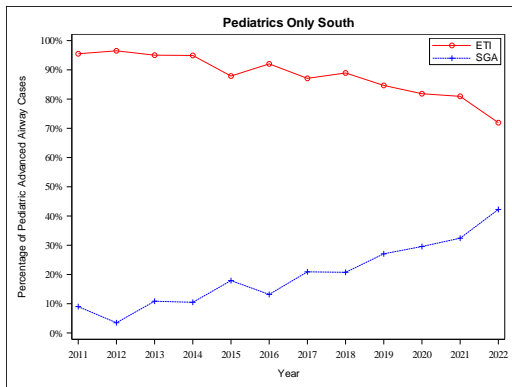

### West Census Region

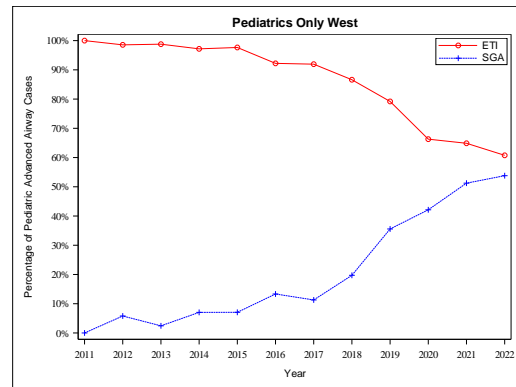

Supplement: jamanetwopen-e2427763-s001.pdf [file jamanetwopen-e2427763-s001.pdf]
