# Supplementary material for: Longitudinal Changes in Emergency Medical Services Advanced Airway Management
Source: PubMed Central journal article supplement (PMC11342135; doi:10.1001/jamanetworkopen.2024.27763), 2024-08-22
Supplement: jamanetwopen-e2427763-s002.pdf [file jamanetwopen-e2427763-s002.pdf]

## Data Sharing Statement

Wang. Longitudinal Changes in Emergency Medical Services Advanced Airway Management. *JAMA Netw Open*. Published August 22, 2024. doi:10.1001/jamanetworkopen.2024.27763

### Data

**Data available:** Yes

**Data types:** Deidentified participant data

**How to access data:** The data used in this study may be requested from ESO, Inc., Austin, Texas

**When available:** With publication

### Supporting Documents

**Document types:** None

### Additional Information

**Who can access the data:** Anyone requesting the data

**Types of analyses:** For any purpose

**Mechanisms of data availability:** The data used in this study may be requested from ESO, Inc., Austin, Texas
